# Supplementary material for: Anhedonia to music and mu-opioids: Evidence from the administration of naltrexone
Source: PubMed Central journal article supplement (PMC5296903; doi:10.1038/srep41952), 2017-02-08
Supplement: srep41952-s1.pdf [file srep41952-s1.pdf]

1           **Supplementary materials to Anhedonia to music and mu-opioids:**  
2                           **evidence from the administration of naltrexone**

3                           Adiel Mallik<sup>1</sup>, Mona Lisa Chanda<sup>2</sup>, and Daniel J. Levitin<sup>1,2,3</sup>

4

5   **Participant selection and screening.**

6           Applicants were screened for normal hearing and health status. Exclusionary  
7 criteria were an allergy to naltrexone, kidney or liver injury or disorder, bipolar,  
8 panic or psychotic disorders, epilepsy, smoking more than 15 cigarettes per day,  
9 pregnancy, substance abuse, use of opioid analgesics, cocaine, recreational drugs  
10 (e.g. marijuana, LSD, ecstasy, etc.) and prescription medication (except oral  
11 contraceptives) within the past 10 days, use of over-the-counter drugs (e.g.  
12 analgesics, anti-inflammatories, sleeping aids, etc.) or alcohol within the past  
13 24 hours. Participants were also excluded if they reported they were currently in  
14 pain (e.g. headache), or if they had used anti-diarrheal medications in the seven days  
15 prior to the study (these are known to interact with naltrexone, e.g. Immodium,  
16 Kaopectate, Pepto-Bismol). Because naltrexone is metabolized by the liver and  
17 kidneys <sup>1-3</sup>, participants were required to provide medical records reporting normal  
18 kidney and liver function results within the past year. We administered blood tests  
19 through an independent laboratory (Medisys, Montreal, QC) for kidney and liver  
20 function for potential participants if they had not already done so in the past year  
21 and wanted to be included; we compensated them \$15 for this. Individuals with  
22 evidence of abnormal kidney or liver function were excluded from the study.

23 All participants who passed initial kidney and liver screening were scheduled  
24 for participation in the experiment, and completed further screening on the two  
25 days of testing for drug use and pregnancy. Screening for drugs of abuse was  
26 conducted with a DrugCheck® Urine Drug Test - 5 panel (DTK, Barrie, ON). The test  
27 detects cocaine, opiates,  $\delta^9$ -tetrahydrocannabinol, amphetamine and  
28 methamphetamine. Urine pregnancy screening was conducted with BFP hCG test  
29 strips (Fairhaven Health, Bellingham, WA, USA) *in vitro* test. There were no positive  
30 results on these tests and thus no participants were excluded at this stage.

### 31 **Sample size and justification.**

32 Based on a power analysis with a specified effect size Cohen's  $f = 0.9$ ,  $\alpha = 0.05$   
33 and power  $(1-\beta) = 0.70$ , we required a sample size of  $n = 15$  participants. Two  
34 participants withdrew due to naltrexone side effects and were replaced, yielding the  
35 desired total of 15 participants. Equipment failures occurred with two participants  
36 during the physiological measures, reducing the physiological dataset to fifteen  
37 participants.

### 38 **Data Analysis**

39 We had two cases of missing data due to equipment malfunction, and as such,  
40 these values were treated as missing completely at random (MCAR) data, and we  
41 used mean imputation to replace them <sup>4</sup>.

42

### 43 **Choice of naltrexone over naloxone.**

44 We chose to administer naltrexone rather than naloxone for the following  
45 reasons: naltrexone can be given orally, in pill form, whereas naloxone must be

46 administered intravenously. The half-life of naltrexone is 4 hours and of naloxone is  
47 60 minutes (which may not have been long enough for us to properly conduct the  
48 study, which was estimated to take 1.5 – 2 hours). The two substances are  
49 chemically similar, both are  $\mu$ -opioid antagonists, and are used in similar studies in  
50 the research literature (Figure S1).

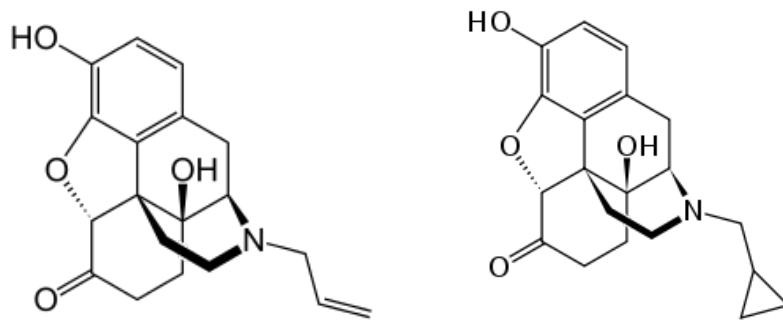

51

52

53 Figure S1.

54 (a) Naloxone molecule

(b) Naltrexone molecule

55

## 56 **Supplementary results**

57 ***Physiological measures: pleasure and neutral music difference of electromyograms***  
58 ***of corrugator muscles***

59 The naltrexone group revealed a significantly smaller difference between  
60 pleasurable music and neutral music in area under the curve electromyogram  
61 corrugator measurements by FRT (Figure S2). For the zygomatic electromyogram  
62 there were no significant differences between pleasurable and neutral music for  
63 either the placebo ( $p = 0.23$ ) or naltrexone conditions ( $p = 0.29$ ).

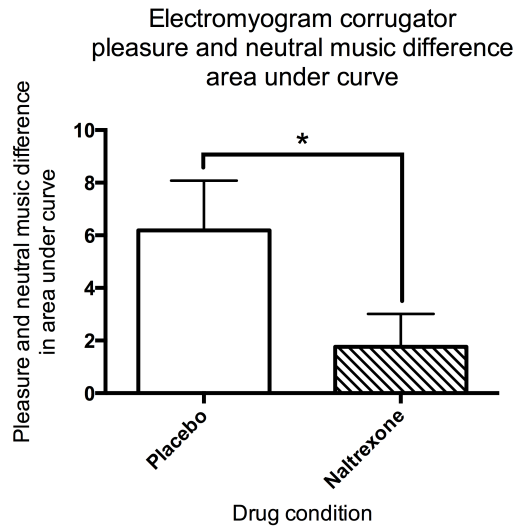

64

65 **Figure S2. Opioid blockade (Naltrexone condition, NTX) caused a decrease in the difference between**  
66 **pleasurable and neutral music in the corrugator electromyogram ( $p < 0.05$ ). Exact one tailed p value**  
67 **comparing placebo and naltrexone is:  $p = 0.015$ . Mean  $\pm$  standard error of mean (SEM) in scaled units**  
68 **were placebo ( $6.19 \pm 1.90$ ), naltrexone ( $1.76 \pm 1.25$ ).**

69

70 ***Behavioral measures: changes in state trait anxiety inventory (STAI) and profile of***  
71 ***mood states (POMS) after placebo/naltrexone treatment***

72 The opioid blockade had no statistically significant impact on anxiety or  
73 mood according to our administration of the STAI and POMS questionnaires 1 hour  
74 after placebo/drug treatment, which suggests that the naltrexone did not  
75 significantly affect the baseline mood of the participant.

76

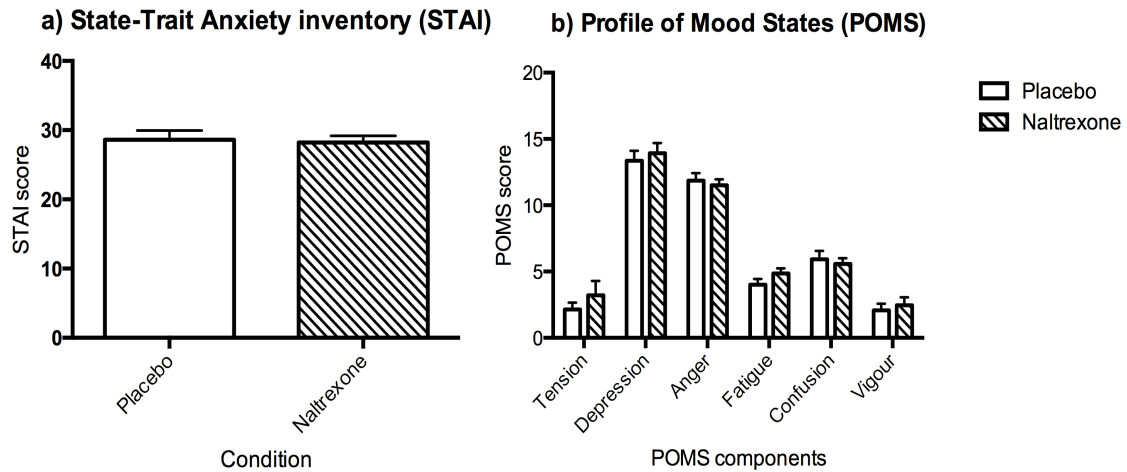

77

78 **Figure S3. Opioid blockade showed no significant changes in a) State-Trait Anxiety Inventory (STAI) or in**  
 79 **any of the b) Profile of Mood States (POMS) components. Error bars indicate standard error of mean.**

80 **Exact one tailed p values comparing placebo and naltrexone are: a) STAI score: p = 0.39, b) Tension: p =**  
 81 **0.13, depression: p = 0.25, anger: p = 0.30, fatigue: p = 0.08, confusion: p = 0.23 and vigour: p = 0.31.**

82 **Mean ± standard error of mean (SEM) are a) placebo: 28.62 ± 1.35, naltrexone: 28.23 ± 0.96. b) tension**  
 83 **placebo: 2.14 ± 0.52, tension naltrexone: 3.21 ± 1.08, depression placebo: 13.36 ± 0.75, depression**

84 **naltrexone: 13.93 ± 0.76, anger placebo: 11.86 ± 0.57 , anger naltrexone: 11.50 ± 0.45, fatigue placebo:**  
 85 **4.0 ± 0.44, fatigue naltrexone: 4.86 ± 0.39 , confusion placebo: 5.94 ± 0.62, confusion naltrexone: 5.57 ±**

86 **0.44, vigour placebo: 2.08 ± 0.50, vigour naltrexone: 2.46 ± 0.60.**

87

88

89 ***Physiological measures: changes in differences between post-placebo/drug and pre-***  
 90 ***placebo/drug for BVPA, RR, EMG ZYG and EMG COR.***

91 The pre-placebo/drug baseline was subtracted from the post-placebo/drug  
 92 baseline to see if the naltrexone had a significant impact on physiological measures  
 93 (BVPA, RR, EMG ZYG and EMG COR) after administration compared to the placebo.

94 The placebo pre/post baseline difference was not found to be significantly different

95 that the naltrexone pre/post baseline difference for all physiological measures  
96 (BVPA, RR, EMG ZYG, EMG COR) (Figure S4) indicating that the naltrexone did not  
97 have a statistically significant impact on baseline physiological measures (BVPA, RR,  
98 EMG ZYG, EMG COR).  
99

### Post-placebo/drug minus pre-placebo/drug physiological baselines

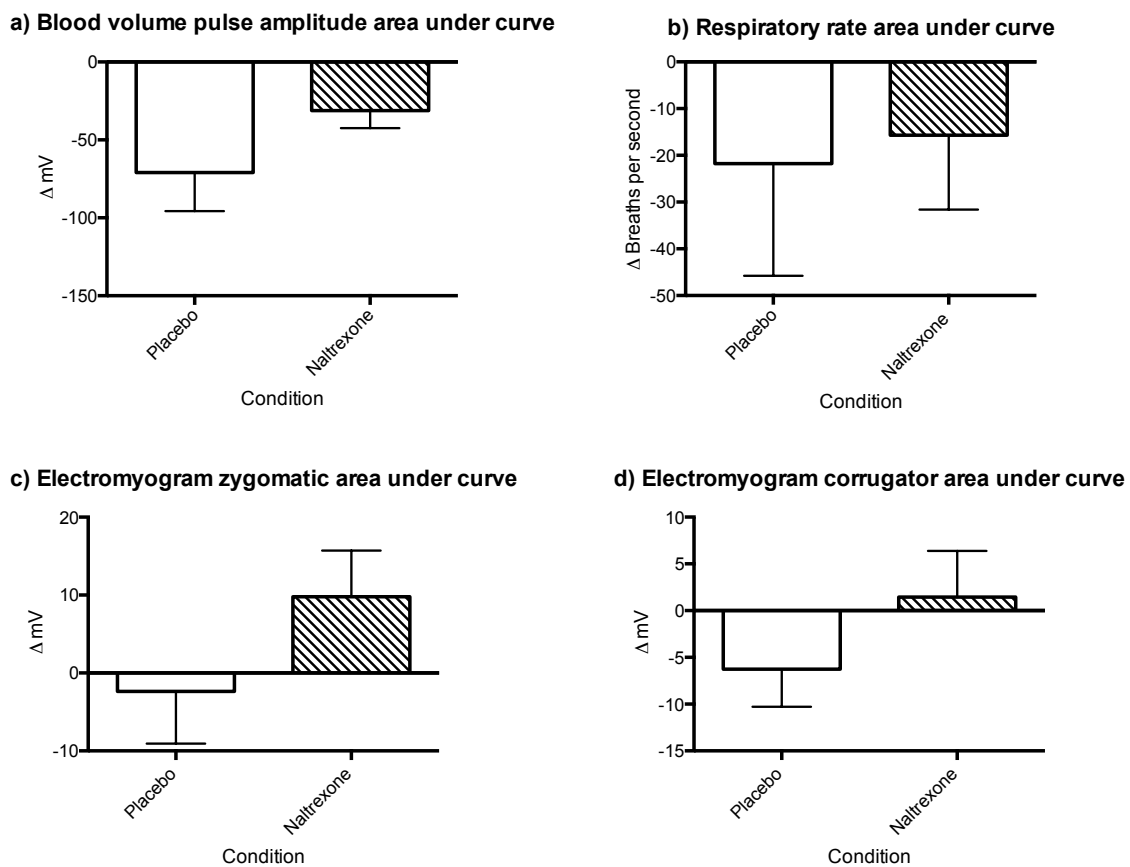

100

101 **Figure S4. Opioid blockade showed no significant changes in differences between pre and post**  
102 **placebo/drug baselines in a) BVPA, b) RR, c) EMG ZYG, d) EMG COR. Error bars indicate standard error**

103 **of mean. Exact one tailed  $p$  values comparing placebo and naltrexone are: a) BVPA  $p = 0.10$ , b) RR  $p =$**

104  **$0.42$ , c) EMG ZYG  $p = 0.07$ , d) EMG COR  $p = 0.15$ . Mean  $\pm$  standard error of mean (SEM) are: a) BVPA**

105 **placebo:  $-70.98 \pm 24.76$ , BVPA naltrexone:  $-31.15 \pm 11.35$ , b) RR placebo:  $-21.76 \pm 24.02$ , RR naltrexone: -**

106 15.67 ± 15.91, c) EMG ZYG placebo: -2.35 ± 6.72, EMG ZYG naltrexone: 9.78 ± 5.94, d) EMG COR placebo:  
107 -6.26 ± 4.01, EMG COR naltrexone: 1.46 ± 4.94.

108

109

110 **Supplementary Materials References**

111

112 1 Crabtree, B. Review of naltrexone, a long-acting opiate antagonist. *Clinical*  
113 *Pharmacy* **3**, 273-280 (1984).

114 2 Verebey, K., Volavka, J., Mulé, S. & Resnick, R. Naltrexone: disposition,  
115 metabolism, and effects after acute and chronic dosing. *Clinical Pharmacology*  
116 *and Therapeutics* **20**, 315-328 (1976).

117 3 Wall, M., Brine, D. & Perez-Reyes, M. The metabolism of naltrexone in man.  
118 *NIDA Research Monograph* **28**, 105-131 (1980).

119 4 Ali, A. M. G., Dawson, S. J., Blows, F. M., Provenzano, E., Ellis, I. O., Baglietto, L.,  
120 ... & Pharoah, P. D. Comparison of methods for handling missing data on  
121 immunohistochemical markers in survival analysis of breast cancer. *British*  
122 *Journal of Cancer*, **104**, 693-699 (2011).
